# Supplementary material
Source: Springer Nature journal article supplement (https://www.springermedizin.de/resource/supplementary/12889_2010_2445_MOESM1_ESM.pdf/9485894)
Supplement: MOESM1 [file 9485894]

Assessed for eligibility  
No. Long day care services

Excluded:  
No. Long day care services

Randomised  
Long day care services (N= 20)

**Allocated to intervention**  
Long day care services (N=10)  
No. of Children

**Allocation**

**Allocated to control**  
Long day care services (N=10)  
No. of Children

**Lost to follow-up**  
No. Long day care services  
No. of Children

**Follow-up**

**Lost to follow-up**  
No. Long day care services  
No. of Children

**Analysed**  
No. Long day care services  
No. of Children

**Analysis**

**Analysed**  
No. Long day care services  
No. of Children
